# Supplementary material for: Household food security and adequacy of child diet in the food insecure region north in Ghana
Source: PubMed Central journal article supplement (PMC5426760; doi:10.1371/journal.pone.0177377), 2017-05-11
Supplement: pone.0177377.s002.pdf [file pone.0177377.s002.pdf]

```
FREQUENCIES VARIABLES=education_level q2_07
/ORDER=ANALYSIS.
```

## Frequencies

### Notes

|                        |                                                                    |                                                                                         |
|------------------------|--------------------------------------------------------------------|-----------------------------------------------------------------------------------------|
| Output Created         | 02-APR-2017 09:31:46                                               |                                                                                         |
| Comments               |                                                                    |                                                                                         |
| Input                  | Data                                                               | C:\Users\Eyram-Eyram\Desktop\Okay\330 VariablesIndividualLevelAnalysisSTRATIFIED---.sav |
|                        | Active Dataset                                                     | DataSet3                                                                                |
|                        | Filter                                                             | <none>                                                                                  |
|                        | Weight                                                             | <none>                                                                                  |
|                        | Split File                                                         | <none>                                                                                  |
|                        | N of Rows in Working Data File                                     | 871                                                                                     |
| Missing Value Handling | Definition of Missing                                              | User-defined missing values are treated as missing.                                     |
|                        | Cases Used                                                         | Statistics are based on all cases with valid data.                                      |
| Syntax                 | FREQUENCIES<br>VARIABLES=education_level q2_07<br>/ORDER=ANALYSIS. |                                                                                         |
| Resources              | Processor Time                                                     | 00:00:00.03                                                                             |
|                        | Elapsed Time                                                       | 00:00:00.04                                                                             |

[DataSet3] C:\Users\Eyram-Eyram\Desktop\Okay\330 VariablesIndividualLevelAnalysisSTRATIFIED---.sav

### Statistics

|   |         | education_level Highest Education Level | q2_07 Can and write English (English Literacy) |
|---|---------|-----------------------------------------|------------------------------------------------|
| N | Valid   | 871                                     | 856                                            |
|   | Missing | 0                                       | 15                                             |

## Frequency Table

**education\_level Highest Education Level**

|       |                   | Frequency | Percent | Valid Percent | Cumulative Percent |
|-------|-------------------|-----------|---------|---------------|--------------------|
| Valid | 0 None            | 805       | 92.4    | 92.4          | 92.4               |
|       | 1 MSLC            | 1         | .1      | .1            | 92.5               |
|       | 2 BECE            | 37        | 4.2     | 4.2           | 96.8               |
|       | 4 Teacher Train A | 2         | .2      | .2            | 97.0               |
|       | 7 SSCE/WASSCE     | 21        | 2.4     | 2.4           | 99.4               |
|       | 10 Tech/Prof Dip  | 2         | .2      | .2            | 99.7               |
|       | 11 HND            | 1         | .1      | .1            | 99.8               |
|       | 15 Other          | 2         | .2      | .2            | 100.0              |
|       | Total             | 871       | 100.0   | 100.0         |                    |

**q2\_07 Can and write English (English Literacy)**

|         |                                 | Frequency | Percent | Valid Percent | Cumulative Percent |
|---------|---------------------------------|-----------|---------|---------------|--------------------|
| Valid   | 0 Cannot Read and Write English | 763       | 87.6    | 89.1          | 89.1               |
|         | 1 Can write English Only        | 2         | .2      | .2            | 89.4               |
|         | 2 Can Read English only         | 9         | 1.0     | 1.1           | 90.4               |
|         | 3 Can read and write English    | 82        | 9.4     | 9.6           | 100.0              |
|         | Total                           | 856       | 98.3    | 100.0         |                    |
| Missing | System                          | 15        | 1.7     |               |                    |
| Total   |                                 | 871       | 100.0   |               |                    |
